# Supplementary material for: NR4A Receptors Differentially Regulate NF-κB Signaling in Myeloid Cells
Source: PubMed Central journal article supplement (PMC5256039; doi:10.3389/fimmu.2017.00007), 2017-01-23
Supplement: Table_3.pdf [file Table_3.pdf]

|    |        | Raw CT value |          |          |          | Fold over control |          |          |
|----|--------|--------------|----------|----------|----------|-------------------|----------|----------|
|    |        | Sc Un        | Sc LPS   | A2 LPS   | A3 LPS   | Sc LPS            | A2 LPS   | A3 LPS   |
| 1  | CXCL2  | 31.14992     | 22.73847 | 22.36268 | 23.26534 | 270.1479          | 477.8786 | 230.6385 |
| 2  | CCL4   | 29.2163      | 21.26891 | 22.25187 | 22.41418 | 195.8424          | 135.0813 | 108.9129 |
| 3  | CCL3   | 30.00071     | 22.1717  | 22.97505 | 23.57886 | 180.4138          | 140.9384 | 83.6769  |
| 4  | SOD2   | 25.53984     | 18.91711 | 19.76765 | 19.50155 | 78.1887           | 59.1148  | 64.1423  |
| 5  | CXCL1  | 29.03405     | 23.61576 | 23.15389 | 23.74967 | 33.9289           | 63.7086  | 38.0358  |
| 6  | JUN    | 26.79071     | 22.32501 | 22.33466 | 22.86494 | 17.5312           | 23.7409  | 14.8323  |
| 7  | CTGF   | 26.72243     | 22.46014 | 24.33148 | 25.69795 | 15.2259           | 5.6734   | 1.9853   |
| 8  | CCL2   | 31.33692     | 27.42727 | 27.5765  | 28.71222 | 11.9241           | 14.6586  | 6.0193   |
| 9  | NR4A2  | 28.32638     | 24.77977 | 26.08987 | 24.76966 | 9.2713            | 5.0974   | 11.4846  |
| 10 | ADRB2  | 27.35419     | 24.51102 | 24.06017 | 25.40049 | 5.6935            | 10.6094  | 3.7806   |
| 11 | BCL6   | 27.39085     | 24.65551 | 24.67729 | 24.94376 | 5.2835            | 7.0951   | 5.3221   |
| 12 | EGR2   | 29.07135     | 26.42558 | 25.93274 | 27.30603 | 4.9655            | 9.526    | 3.3178   |
| 13 | RELB   | 24.75997     | 22.19641 | 22.30392 | 22.66935 | 4.6904            | 5.9352   | 4.157    |
| 14 | IRAK2  | 27.98981     | 25.44953 | 25.2757  | 25.8333  | 4.6153            | 7.0978   | 4.3512   |
| 15 | IGFBP3 | 28.20742     | 25.77161 | 25.26742 | 25.81345 | 4.2929            | 8.3008   | 5.1297   |
| 16 | NFKB1  | 24.60679     | 22.17247 | 22.27395 | 22.53165 | 4.2885            | 5.4494   | 4.1126   |
| 17 | BCL3   | 26.49616     | 24.54499 | 23.58496 | 24.20171 | 3.0681            | 8.1367   | 4.7878   |
| 18 | PIM3   | 23.39751     | 21.53365 | 21.5566  | 21.91324 | 2.8879            | 3.8749   | 2.7305   |
| 19 | CCR7   | 29.53502     | 27.69137 | 27.28666 | 27.96899 | 2.8477            | 5.1395   | 2.8897   |
| 20 | CSF1   | 29.4992      | 27.68489 | 26.5548  | 27.56183 | 2.7904            | 8.3262   | 3.738    |
| 21 | CREB1  | 26.24313     | 24.44304 | 25.7768  | 25.08096 | 2.763             | 1.4944   | 2.1842   |
| 22 | SOD1   | 26.60117     | 24.92122 | 25.2939  | 25.36507 | 2.5422            | 2.6768   | 2.299    |
| 23 | HLAB   | 24.15229     | 22.80569 | 22.32429 | 22.65917 | 2.0178            | 3.8404   | 2.7473   |
| 24 | CSF2   | 33.74995     | 32.74287 | 31.83027 | 32.8361  | 1.5946            | 4.0924   | 1.8388   |
| 25 | PIM1   | 27.0869      | 26.12467 | 25.16558 | 26.02549 | 1.5458            | 4.097    | 2.0368   |
| 26 | IRF1   | 24.44476     | 23.53282 | 22.82708 | 23.12451 | 1.4929            | 3.3194   | 2.4371   |
| 27 | LCN2   | 29.83711     | 28.93657 | 29.15518 | 28.93227 | 1.4811            | 1.7353   | 1.8273   |
| 28 | CXCL13 | 28.55065     | 27.75372 | 27.75275 | 27.86095 | 1.3785            | 1.8806   | 1.5742   |
| 29 | CCR3   | 28.71318     | 27.91974 | 28.29062 | 28.55029 | 1.3752            | 1.4498   | 1.0926   |
| 30 | GSTP1  | 21.85443     | 21.06199 | 21.01799 | 20.93047 | 1.3742            | 1.9315   | 1.8517   |
| 31 | NR4A1  | 27.45214     | 26.68767 | 26.47102 | 27.36009 | 1.3478            | 2.1352   | 1.0403   |
| 32 | VEGF   | 25.0445      | 24.29543 | 24.65013 | 25.26309 | 1.3335            | 1.4217   | 0.8388   |
| 33 | STAT1  | 24.4347      | 23.73359 | 23.10971 | 23.18428 | 1.2899            | 2.7099   | 2.3219   |
| 34 | EGF    | 29.49569     | 28.82897 | 28.73617 | 28.48778 | 1.2595            | 1.8312   | 1.9627   |
| 35 | CCR10  | 28.78988     | 28.15419 | 28.68277 | 28.21911 | 1.2327            | 1.165    | 1.4496   |
| 36 | PLCB4  | 33.26122     | 32.64249 | 32.23985 | 35.27039 | 1.2183            | 2.1956   | 0.2924   |
| 37 | CCL5   | 23.90444     | 23.29534 | 22.85884 | 24.26637 | 1.2102            | 2.2328   | 0.7594   |
| 38 | CCR9   | 28.76031     | 28.17448 | 28.48203 | 27.92778 | 1.1908            | 1.3118   | 1.738    |
| 39 | CSF1R  | 25.85252     | 25.28747 | 25.26379 | 24.69856 | 1.1738            | 1.6267   | 2.1718   |
| 40 | HLAA   | 23.37243     | 22.82101 | 25.91243 | 22.65352 | 1.1628            | 0.186    | 1.6064   |
| 41 | VEGFA  | 24.6753      | 24.15375 | 24.52227 | 25.18519 | 1.139             | 1.2027   | 0.6854   |
| 42 | PIM2   | 24.49816     | 23.98961 | 23.266   | 23.95461 | 1.1287            | 2.541    | 1.4225   |
| 43 | CD88   | 28.77457     | 28.27883 | 27.92855 | 27.95474 | 1.1188            | 1.9443   | 1.7228   |
| 44 | CD8A   | 34.2394      | 33.76821 | 33.78652 | 33.69176 | 1.0999            | 1.4806   | 1.4266   |
| 45 | C5     | 26.77764     | 26.31187 | 26.54886 | 26.14644 | 1.0958            | 1.2675   | 1.5116   |

|    |        |          |          |          |          |          |          |          |
|----|--------|----------|----------|----------|----------|----------|----------|----------|
| 46 | UBC    | 19.86549 | 19.40108 | 19.10241 | 19.3764  | 1.0947   | 1.8357   | 1.3698   |
| 47 | F2     | 29.19934 | 28.80787 | 28.67804 | 28.81088 | 1.0408   | 1.5525   | 1.2775   |
| 48 | TNFR   | 27.07616 | 26.72774 | 26.77651 | 26.94088 | 1.0102   | 1.3314   | 1.0719   |
| 49 | CD4    | 23.19196 | 22.91118 | 23.21299 | 23.36378 | 0.9639   | 1.066    | 0.8664   |
| 50 | CXCL5  | 29.27982 | 29.01321 | 29.22351 | 28.74011 | 0.9545   | 1.1247   | 1.4188   |
| 51 | PSMD3  | 22.96623 | 22.75305 | 22.31168 | 22.36795 | 0.9198   | 1.7027   | 1.4775   |
| 52 | IRAK1  | 22.08351 | 21.89395 | 21.6256  | 21.71109 | 0.9048   | 1.4857   | 1.2634   |
| 53 | CD8B   | 27.92932 | 27.74818 | 27.79096 | 27.51084 | 0.8996   | 1.1905   | 1.3044   |
| 54 | CCL23  | 25.95272 | 25.79071 | 25.93948 | 26.72124 | 0.8877   | 1.0916   | 0.5729   |
| 55 | TGFB1  | 23.2707  | 23.20074 | 22.95317 | 22.78349 | 0.8328   | 1.348    | 1.368    |
| 56 | CCL21  | 27.85966 | 27.80712 | 27.61073 | 27.1968  | 0.8228   | 1.2854   | 1.5452   |
| 57 | BCAM   | 28.91295 | 28.86309 | 29.15332 | 29.90005 | 0.8213   | 0.9157   | 0.4924   |
| 58 | CCL22  | 27.0687  | 27.08534 | 26.71331 | 26.95792 | 0.7843   | 1.3838   | 1.0539   |
| 59 | IGFBP2 | 23.35605 | 23.40438 | 23.55452 | 24.39974 | 0.7673   | 0.9426   | 0.4734   |
| 60 | HIF1A  | 23.80524 | 23.85501 | 23.72005 | 23.82723 | 0.7665   | 1.1475   | 0.9612   |
| 61 | MMP2   | 26.22093 | 26.41629 | 25.82162 | 26.38552 | 0.6929   | 1.4266   | 0.8707   |
| 62 | PAI1   | 26.95213 | 27.16122 | 25.2548  | 29.09395 | 0.6864   | 3.5079   | 0.2211   |
| 63 | TGFB1  | 26.16486 | 26.37853 | 26.03129 | 26.23649 | 0.6842   | 1.1866   | 0.9287   |
| 64 | CASP1  | 26.03423 | 26.29567 | 26.09057 | 25.42818 | 0.6619   | 1.0402   | 1.4855   |
| 65 | TIRAP  | 29.55846 | 30.03474 | 29.84398 | 29.42449 | 0.5703   | 0.8875   | 1.0709   |
| 66 | FOS    | 24.79805 | 25.28494 | 23.99652 | 24.45    | 0.5662   | 1.8853   | 1.2423   |
| 67 | RARA   | 24.13761 | 24.94797 | 24.60934 | 24.86743 | 0.4524   | 0.78     | 0.5885   |
| 68 | CCR2   | 24.55592 | 25.99046 | 26.03858 | 25.18642 | 0.2935   | 0.3871   | 0.6304   |
| 69 | TBP    | 24.90204 | 24.59749 | 24.54666 | 24.69837 |          |          |          |
| 70 | HPRT1  | 24.72117 | 23.98555 | 25.93588 | 24.83725 |          |          |          |
| 71 | GAPDH  | 18.69646 | 18.5585  | 18.43142 | 18.80203 |          |          |          |
| 72 | ACTB   | 16.37471 | 16.21746 | 16.23345 | 16.21637 |          |          |          |
| 73 | IL5    | 35.05675 | 35.40499 | Undeterm | Undeterm | 0.7934   | 1.0817   | 0.976    |
| 74 | MUC5AC | 35.07878 | 33.48107 | 34.21128 | 34.25095 | 2.2738   | 1.8686   | 1.6403   |
| 75 | IL15   | 35.08383 | 34.34113 | 32.40438 | 35.99188 | 1.2527   | 6.5381   | 0.976    |
| 76 | RETN   | 35.25301 | 33.32288 | 33.91895 | 34.45923 | 2.5373   | 2.2883   | 1.4198   |
| 77 | CCL11  | 35.62135 | 33.73069 | 37.50751 | Undeterm | 1.9125   | 1.0817   | 0.976    |
| 78 | CCL18  | 35.65987 | 32.85978 | 32.41666 | 33.97801 | 3.4976   | 6.4827   | 1.9819   |
| 79 | CCL8   | 36.23048 | 32.90314 | 31.7187  | 33.23433 | 3.3941   | 10.5163  | 3.3186   |
| 80 | CXCL3  | 36.5421  | 25.40423 | 24.795   | 25.98067 | 613.9275 | 1276.75  | 506.4362 |
| 81 | MMP3   | 36.81456 | 38.50647 | 36.78519 | 37.38254 | 0.7934   | 1.0817   | 0.976    |
| 82 | CCL19  | 36.81662 | 33.65831 | 34.43886 | 32.83365 | 2.0109   | 1.5959   | 4.381    |
| 83 | PLAT   | 36.91149 | 34.43683 | 31.85399 | 33.53905 | 1.1723   | 9.575    | 2.6867   |
| 84 | CCL7   | 37.02137 | 35.30249 | 34.82135 | 34.53918 | 0.7934   | 1.2243   | 1.3433   |
| 85 | CXCL3  | 37.36361 | 25.19321 | 24.83692 | 25.97578 | 710.6249 | 1240.179 | 508.1567 |
| 86 | IL24   | 37.89324 | 34.74892 | 34.88383 | 37.90767 | 0.9442   | 1.1724   | 0.976    |
| 87 | EDN1   | 39.52799 | 32.47358 | 32.37841 | 33.58132 | 4.5712   | 6.6569   | 2.6092   |
| 88 | IGFBP1 | 39.53119 | Undeterm | Undeterm | Undeterm | 0.7934   | 1.0817   | 0.976    |
| 89 | CCL13  | 39.73958 | 37.61808 | 35.56335 | 38.72113 | 0.7934   | 1.0817   | 0.976    |
| 90 | TGFB2  | 39.85622 | Undeterm | Undeterm | Undeterm | 0.7934   | 1.0817   | 0.976    |
| 91 | NOD2   | Undeterm | Undeterm | 39.51672 | Undeterm | 0.7934   | 1.0817   | 0.976    |
| 92 | VCAM1  | Undeterm | 34.01697 | 30.35393 | 31.14284 | 1.5683   | 27.0832  | 14.1436  |
| 93 | RELMB  | Undeterm | 37.94013 | 39.71878 | 39.73948 | 0.7934   | 1.0817   | 0.976    |
| 94 | PCK1   | Undeterm | 36.00609 | Undeterm | Undeterm | 0.7934   | 1.0817   | 0.976    |
| 95 | BCMA   | Undeterm | Undeterm | Undeterm | Undeterm | 0.7934   | 1.0817   | 0.976    |
| 96 | EGFR   | Undeterm | 32.45424 | 33.60786 | 36.97974 | 4.6329   | 2.839    | 0.976    |

**Supplemental Table 3: PCR array gene expression analysis.** Undifferentiated THP-1 cells transduced with shRNA directed against scrambled non target control (Sc), NR4A2 (A2) or NR4A3 (A3) were treated with LPS (100ng/ml) for 2hrs. RNA was isolated from 3 technical replicates, pooled and a PCR array (consisting of 92 target genes and 4 reference genes) was performed for each treatment. Displayed here are raw CT values, fold over untreated (Un) control values (calculated as described in materials and methods). Values in red are those that changed  $\geq 2$  fold greater than Sc Un. Values in blue are those that changed  $\geq 2$  fold less than Sc Un. Reference genes are highlighted yellow and genes whose Sc Un had CT values  $\geq 35$  and deemed unreliable are highlighted in green.
